# Supplementary material
Source: HighWire-hosted journal article supplement (https://bmjopen.bmj.com/content/12/3/e058231)
Supplement: inline-supplementary-material-1 [file inline-supplementary-material-1.pdf]

**Supplementary table 1** ICD-9-CM and ICD-10-CM codes for comorbidities

| Comorbidities                                      | ICD-9-CM code                                                                             | ICD-10-CM code               |
|----------------------------------------------------|-------------------------------------------------------------------------------------------|------------------------------|
| Cancer                                             | 140~208                                                                                   | C, D0                        |
| Diabetes                                           | 250                                                                                       | E08~E13                      |
| Chronic kidney disease                             | 585, 586                                                                                  | N18                          |
| Congestive heart failure                           | 428, 398.91, 402.01, 402.11,<br>402.91, 404.01, 404.03, 404.11,<br>404.13, 404.91, 404.93 | I50, I0981, I110, I130, I132 |
| Coronary heart disease                             | 410~414                                                                                   | I20~I25                      |
| Liver cirrhosis                                    | 571, 571.2, 571.5, 571.6                                                                  | K703, K717, K746             |
| Chronic obstructive pulmonary disease              | 491, 492, 518.1, 518.2, 770.2                                                             | J41~J44                      |
| Dementia                                           | 290                                                                                       | F01~F03                      |
| Cerebrovascular disease                            | 430~437                                                                                   | G46.3, G46.4, I60~I66, I69   |
| Opportunistic infections                           |                                                                                           |                              |
| Cytomegalovirus disease                            | (078.5                                                                                    | B25                          |
| Tuberculosis                                       | 010~018                                                                                   | A15~A19                      |
| Disseminated Mycobacterium avium complex infection | 31.2                                                                                      | A31.2                        |

|                                                                      |        |                   |
|----------------------------------------------------------------------|--------|-------------------|
| Pneumocystis jirovecii pneumonia (or pneumocystis carinni pneumonia) | 136.3  | B59               |
| Cryptococcal meningitis                                              | (321.0 | B45.1             |
| Candidiasis                                                          | 112    | B37               |
| Penicillium marneffeii infection                                     | 117.9  | B48.3, B48.8, B49 |
| Herpes zoster                                                        | ((053) | B02               |
| AIDS-related cancer                                                  |        |                   |
| Kaposi sarcoma                                                       | 176    | C46               |
| Non-Hodgkin lymphoma                                                 | 202.8  | C85.8, C85.9      |
| Cervix                                                               | 180    | C53.9             |

---

ICD-9-CM, International Classification of Diseases, Ninth Revision, Clinical Modification; ICD-10-CM, International Classification of Diseases, Tenth Revision, Clinical Modification; AIDS, acquired immune deficiency syndrome.
